# Supplementary material for: Dietary Complex and Slow Digestive Carbohydrates Promote Bone Mass and Improve Bone Microarchitecture during Catch-Up Growth in Rats
Source: MDPI journal article supplement (doi:10.3390/nu14061303), 2022-03-19
Supplement: s1 [file s1]

## Supplementary material

**Table S1.** Bone densitometry parameters at the end of the restriction period

| Densitometry parameters   | Tibia        |                   | Femur        |                   | Lumbar Vertebrae (2-5) |                   |
|---------------------------|--------------|-------------------|--------------|-------------------|------------------------|-------------------|
|                           | NR           | RR                | NR           | RR                | NR                     | RR                |
| BMD (mg/cm <sup>2</sup> ) | 158.2 ±2.33  | 127.4 ±6.61<br>*  | 214.6 ±7.02  | 160.2 ±13.16<br>* | 167.7 ±4.27            | 119.7 ±9.18<br>*  |
| BMC (g)                   | 0.3049 ±0.01 | 0.1688 ±0.22<br>* | 0.3537 ±0.02 | 0.2437 ±0.04<br>* | 0.3089 ±0.015          | 0.1484 ±0.03<br>* |

Data presented as mean ±S.E.M. NR, not restricted group; RR, restricted group; BMC, bone mineral content; BMD, bone mineral density. \*Significant difference compared to the NR group (p-value <0.05).

**Table S2.** Micro-CT trabecular parameters of tibia and vertebra at the end of the restriction period

| Micro-CT Parameter          | Tibia         |                | Vertebra     |               |
|-----------------------------|---------------|----------------|--------------|---------------|
|                             | NR            | RR             | NR           | RR            |
| BV/TV (ratio)               | 0.1207 ±0.011 | 0.045 ±0.007*  | 0.277 ±0.010 | 0.233 ±0.010* |
| Tb.Th (mm)                  | 0.051 ±0.001  | 0.050 ±0.003   | 0.077 ±0.001 | 0.066 ±0.002* |
| Tb.N (1/mm)                 | 3.329 ±0.267  | 1.566 ±0.214*  | 3.777 ±0.101 | 3.593 ±0.046  |
| Tb.Sp (mm)                  | 0.275 ±0.017  | 0.6980 ±0.095* | 0.244 ±0.008 | 0.258 ±0.004  |
| Conn.D (1/mm <sup>3</sup> ) | 83.32 ±9.326  | 23.22 ±5.215*  | 93.69 ±4.446 | 94.75 ±3.432  |

Data presented as mean ±S.E.M. NR group, not restricted group; RR group, restricted group; BV/TV, bone volume/total volume; Tb.Th, trabecular thickness; Tb.N, trabecular number; Tb.Sp, trabecular separation; Conn.D, connectivity density. \*Significant difference compared to NR group (p-value <0.05).

**Table S3.** Micro-CT growth plate parameters at the end of the restriction period

| Micro-CT Parameter            | NR           | RR            |
|-------------------------------|--------------|---------------|
| GP Surface (mm <sup>2</sup> ) | 46.62 ±1.410 | 30.87 ±1.605* |
| GP Thickness (mm)             | 0.206 ±0.009 | 0.133 ±0.014* |
| GP Volume (mm <sup>3</sup> )  | 7.049 ±0.568 | 2.758 ±0.611* |

Data presented as mean ±S.E.M. NR group, not restricted group; RR group, restricted group; GP, growth plate. \*Significant difference compared to NR group (p-value <0.05).

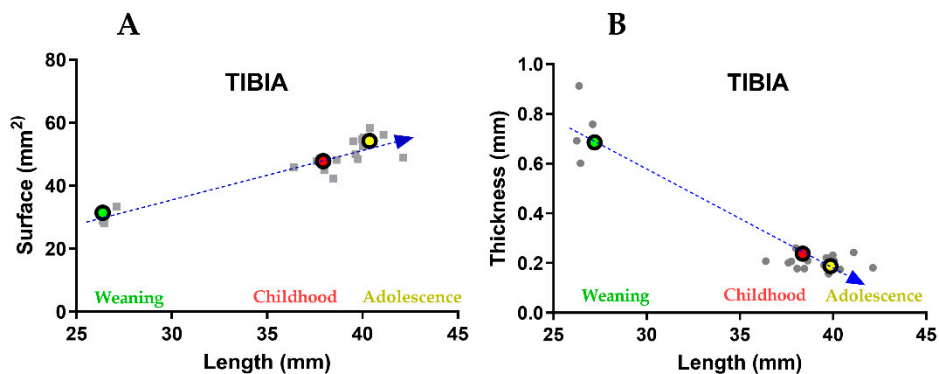

**Figure S1.** Evolution of tibia growth plate surface (A) and thickness (B) in normal fed rats throughout the different stages of life (NR group).
